# Supplementary material for: LDL Promotes Disorders in β-Cell Cholesterol Metabolism, Implications on Insulin Cellular Communication Mediated by EVs
Source: MDPI journal article supplement (doi:10.3390/metabo12080754), 2022-08-16

## LDL promotes disorders in $\beta$ -cells cholesterol metabolism, implications on insulin cellular communication mediated by EVs.

Lizbeth Guevara-Olaya<sup>1,2,#</sup>, Brenda Chimal-Vega<sup>1,2,#</sup>, César Yahel Castañeda-Sanchez<sup>1,2</sup>, Leslie Y. López-Cossio<sup>1,2</sup>, Angel Pulido-Capiz<sup>1,3</sup>, Octavio Galindo-Hernández<sup>1,2</sup>, Raúl Díaz-Molina<sup>1,2</sup>, Josefina Ruiz Esparza Cisneros<sup>4</sup>, Victor García-González<sup>1,2\*</sup>.

<sup>1</sup>Departamento de Bioquímica, Facultad de Medicina Mexicali, Universidad Autónoma de Baja California, Mexicali 21000, Baja California, México.

<sup>2</sup>Laboratorio Multidisciplinario de Estudios Metabólicos y Cáncer. Facultad de Medicina Mexicali, Universidad Autónoma de Baja California, Mexicali 21000, Baja California, México.

<sup>3</sup>Laboratorio de Biología Molecular, Facultad de Medicina Mexicali, Universidad Autónoma de Baja California, Mexicali 21000, Baja California, México.

<sup>4</sup>Departamento de Nutrición, Facultad de Medicina, Universidad Autónoma de Baja California, Mexicali 21000, Baja California, México.

# Equal contribution.

\*To whom correspondence should be addressed.

### Supplementary figures

**Figure S1.** Characterization of fractions LDL isolation was obtained by the KBr-ultracentrifugation method. Western-blot images of apoB and ApoA-1 characterized in plasma, VLDL/IDL, LDL, and HDL fractions, as well as in plasma-free lipoproteins.

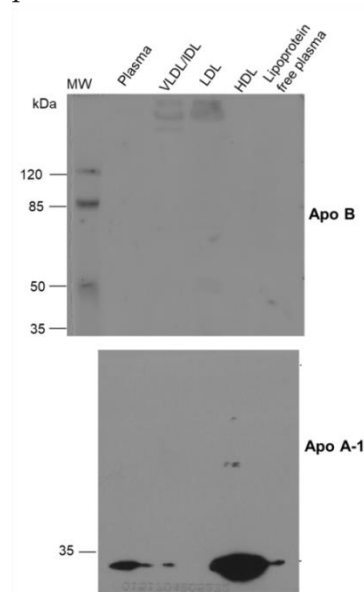

**Figure S2. LDL endocytosis in C9 cells (hepatocytes).** C9 cells were treated with increasing concentrations of dil-LDL (0-20  $\mu\text{g/mL}$ ), representative images showing Hoescht (blue), dil-LDL (red), and merge in each treatment.

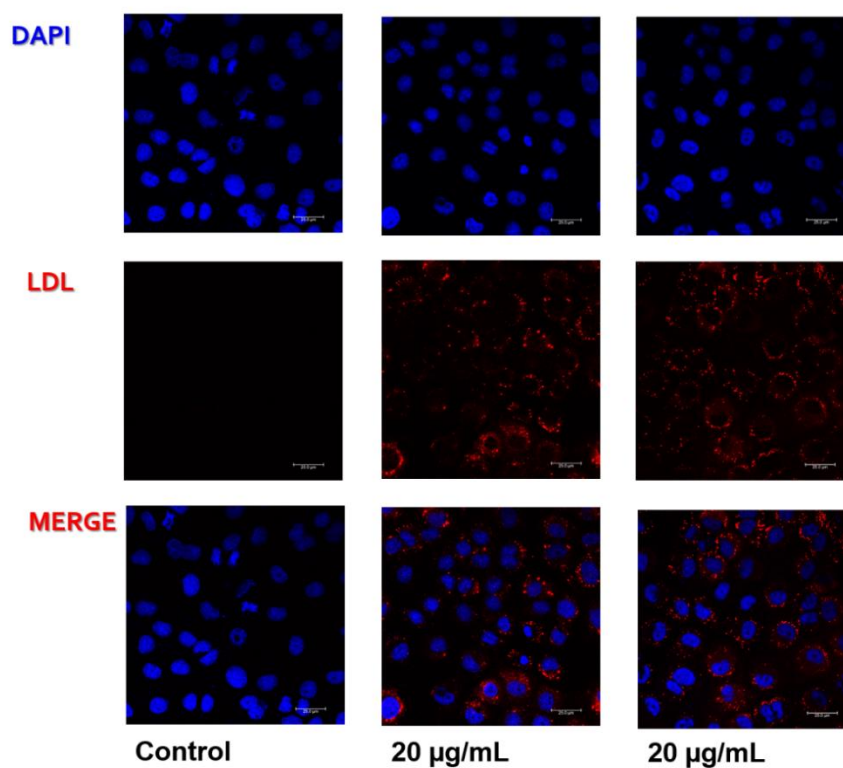

**Figure S3. Characterization of endoplasmic reticulum isolates through the evaluation of protein markers PDI, SERCA2 under LDL treatment.**

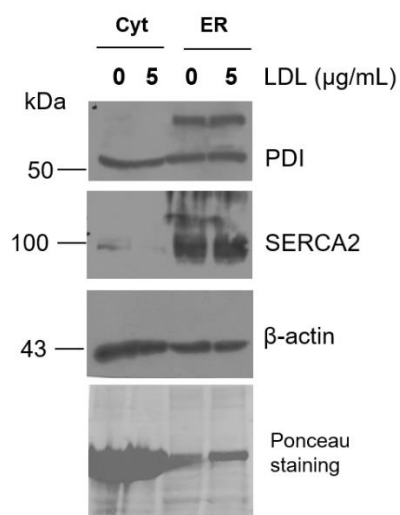

**Figure S4.** Auraptene (Aur) treatment (4-16  $\mu$ M) regulates the expression of cholesterol transporter ABCA1 in Langerhans  $\beta$ -cells. Western-blot of ABCA1 in cellular extracts under LDL (20 $\mu$ g/mL) and Aur treatments. Tunicamycin (Tum) was used as an endoplasmic reticulum stress inducer.  $\beta$ -actin was used as a loading control.

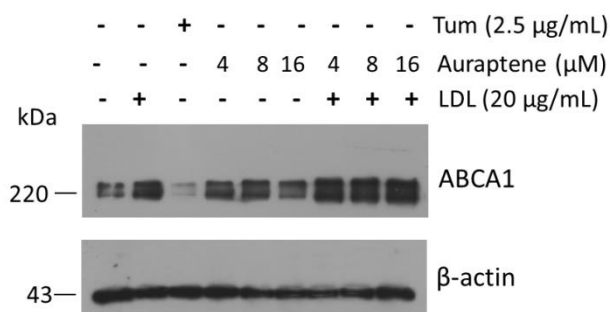

**Figure S5** VPS4 expression in Langerhans  $\beta$ -cells under LDL and auraptene (Aur) treatment. Western-blot of VPS4 in cellular extracts under LDL (20 $\mu$ g/mL) and Aur treatments.  $\beta$ -actin was used as a loading control. Quantitative characterization of VPS4, results are expressed as % of control, (n = 3, mean  $\pm$ SD).

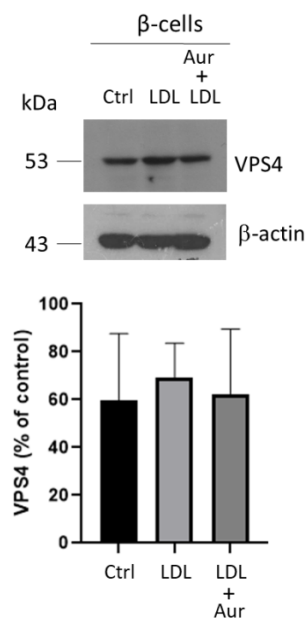

**Figure S6.** Effect of LDL (20  $\mu\text{g/mL}$ ) and insulin (Ins) (28 IU/L) on insulin signaling in hepatocyte cultures through p-p70S6K $\alpha$ , p70S6K $\alpha$ , and eIF4E.  $\beta$ -actin was used as a loading control.

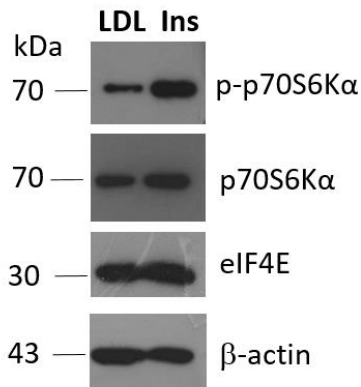

**Figure S7.** Evaluation of protocols employed in cellular fractionation on Langerhans  $\beta$ -cell cultures. Lamin B1 western-blot detection in samples of protocol A (sucrose/imidazol), protocol B (manitol/sucrose), and protocol C (sucrose gradient/HEPES). Nucleus (N) and cytoplasm (C) are depicted.

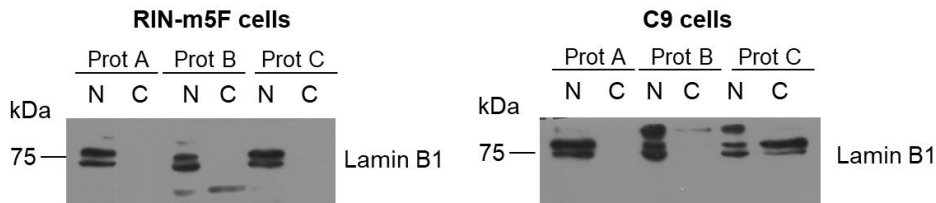

Supplement: s1 [file s1]
